# Supplementary material for: Survey on Antibiotic Residues in Egg Samples in Italy
Source: MDPI journal article supplement (doi:10.3390/separations8090148), 2021-09-09
Supplement: s1 [file s1]

Supplementary material

# Survey on Antibiotic Residues in Egg Samples in Italy

Giorgio Saluti \*, Maria Novella Colagrande, Federica Castellani, Matteo Ricci, Gianfranco Diletti and Giampiero Scortichini

Istituto Zooprofilattico Sperimentale dell'Abruzzo e del Molise "G. Caporale", Via Campo Boario, 64100, Teramo, Italy

\* Correspondence: g.saluti@izs.it

**Table S1.** List of the 73 investigated analytes.

| Class (Number of Analytes) | Analyte                         |
|----------------------------|---------------------------------|
| Amphenicols (3)            | Florfenicol                     |
|                            | Florfenicol amine               |
|                            | Thiamfenicol                    |
| Cephalosporins (9)         | Cefacetrile                     |
|                            | Cefalexin                       |
|                            | Cefalonium                      |
|                            | Cefazolin                       |
|                            | Cefoperazone                    |
|                            | Cefquinome                      |
|                            | Cephapirin                      |
|                            | Ceftiofur                       |
|                            | Desacetyl cephalpirin           |
| Diaminopyrimidines (1)     | Trimethoprim                    |
| Lincosamides (2)           | Lincomycin                      |
|                            | Pirlimycin                      |
| Macrolides (11)            | Erithromycin A                  |
|                            | Gamitromycin                    |
|                            | Neospiramycin                   |
|                            | Spiramycin I                    |
|                            | Tildipirosin                    |
|                            | Tilmicosin                      |
|                            | Tylosin A                       |
|                            | Tylosin-3-acetate               |
|                            | Tulathromycin A                 |
|                            | Tulatromycin marker (CP 60,300) |
|                            | Tylvalosin                      |
| Penicillins (8)            | Amoxicillin                     |
|                            | Ampicillin                      |
|                            | Cloxacillin                     |
|                            | Dicloxacillin                   |
|                            | Nafcillin                       |
|                            | Oxacillin                       |
|                            | Penicillin G                    |
|                            | Penicillin V                    |
| Pleuromutilins (2)         | Tiamulin                        |
|                            | Valnemulin                      |

|                   |                        |
|-------------------|------------------------|
| Quinolones (10)   | Ciprofloxacin          |
|                   | Danofloxacin           |
|                   | Difloxacin             |
|                   | Enrofloxacin           |
|                   | Flumequine             |
|                   | Marbofloxacin          |
|                   | Nalidixic acid         |
|                   | Norfloxacin            |
|                   | Oxolinic acid          |
|                   | Sarafloxacin           |
| Rifamycins (1)    | Rifaximin              |
| Sulfonamides (19) | Sulfacetamide          |
|                   | Sulfachloropyridazine  |
|                   | Sulfadiazine           |
|                   | Sulfadimethoxine       |
|                   | Sulfadoxin             |
|                   | Sulfaguanidine         |
|                   | Sulfamerazine          |
|                   | Sulfameter             |
|                   | Sulfamethizole         |
|                   | Sulfamethoxazole       |
|                   | Sulfamethoxypyridazine |
|                   | Sulfamonomethoxine     |
|                   | Sulfamethazine         |
|                   | Sulfamoxole            |
|                   | Sulfanilamide          |
|                   | Sulfapyridine          |
|                   | Sulfaquinoxaline       |
|                   | Sulfathiazole          |
|                   | Sulfisoxazole          |
| Tetracyclines (7) | 4-Epichlortetracycline |
|                   | 4-Epioxytetracycline   |
|                   | 4-Epitetracycline      |
|                   | Chlortetracycline      |
|                   | Doxycycline            |
|                   | Oxytetracycline        |
|                   | Tetracycline           |

**Table S2.** Individual stock solutions of analytes (storage temperature: -20°C).

| Drug class<br>(Number of Compounds) | Exceptions                                                              | Solvent                                    | Concentration<br>( $\mu\text{g mL}^{-1}$ ) | Storage Time<br>(months)              |
|-------------------------------------|-------------------------------------------------------------------------|--------------------------------------------|--------------------------------------------|---------------------------------------|
| Amphenicols (3)                     | -                                                                       | MeOH                                       | 100                                        | 12 <sup>1</sup>                       |
| Cefalosporins (9)                   | -                                                                       | Water/ACN 75/25,<br><i>v/v</i>             | 100                                        | 9 <sup>2</sup>                        |
|                                     | cefquinome                                                              |                                            |                                            | 1 <sup>1</sup>                        |
|                                     | desacetylcephapirin                                                     | DMF                                        |                                            | 8 <sup>1</sup>                        |
|                                     | ceftiofur                                                               |                                            |                                            | 9 <sup>2</sup>                        |
| Diaminopyrimidines (1)              | -                                                                       | MeOH                                       | 100                                        | 24 <sup>1</sup>                       |
| Lincosamides (2)                    | -                                                                       | MeOH                                       | 100                                        | 9 <sup>2</sup>                        |
| Macrolides (11)                     | -<br>erythromycin A, tilmicosin, tylosin A                              | MeOH                                       | 100                                        | 6 <sup>1</sup><br>9 <sup>2</sup>      |
| Penicillins (8)                     | -<br>penicillin V                                                       | Water/ACN 75/25,<br><i>v/v</i>             | 100                                        | 9 <sup>2</sup><br>3 <sup>1</sup>      |
| Pleuromutilins (2)                  | -                                                                       | MeOH                                       | 100                                        | 12 <sup>1</sup>                       |
| Quinolones (10)                     | -                                                                       | Water/MeOH 80/20,<br><i>v/v</i>            | 100                                        | 6 <sup>3</sup>                        |
|                                     | ciprofloxacin, enrofloxacin, nalidixic acid, norfloxacin, oxolinic acid | DMF                                        |                                            |                                       |
| Rifamycins (1)                      | -                                                                       | MeOH/H <sub>2</sub> O 50/50,<br><i>v/v</i> | 100                                        | 6 <sup>1</sup>                        |
| Sulphonamides (19)                  | -                                                                       | MeOH                                       | 100                                        | 24 <sup>1</sup>                       |
| Tetracyclines (7)                   | -<br>4-epioxytetracycline                                               | MeOH                                       | 100                                        | 3 <sup>1</sup><br>7 days <sup>1</sup> |

<sup>1</sup> Tested in-house, <sup>2</sup> [18] <sup>3</sup> [19].

Table S3. UHPLC-Q-Orbitrap parameters of the 73 analytes and 7 ISs.

| Peak | Analyte                                      | RT<br>(min) | Molecular Formula                                                                 | Adduct                              | Monoisotopic<br>Exact Mass<br>(m/z) | CE | Fragment 1<br>1<br>(m/z) | Fragment 2<br>1<br>(m/z) |
|------|----------------------------------------------|-------------|-----------------------------------------------------------------------------------|-------------------------------------|-------------------------------------|----|--------------------------|--------------------------|
| 1    | Sulfaguanidine                               | 3.2         | C <sub>7</sub> H <sub>10</sub> N <sub>4</sub> O <sub>2</sub> S                    | [M+H] <sup>+</sup>                  | 215.0597                            | 20 | 108.1                    | 156.0                    |
| 2    | Florfenicol amine                            | 3.6         | C <sub>10</sub> H <sub>14</sub> FN <sub>3</sub> O <sub>3</sub> S                  | [M+H] <sup>+</sup>                  | 248.0751                            | 18 | 230.1                    | 130.1                    |
| 3    | Sulfanilamide                                | 3.6         | C <sub>6</sub> H <sub>8</sub> N <sub>2</sub> O <sub>2</sub> S                     | [M+H-NH <sub>3</sub> ] <sup>+</sup> | 156.0114                            | 20 | 92.1                     | 108.1                    |
| 4    | Desacetyl-cephapirin                         | 5.7         | C <sub>15</sub> H <sub>15</sub> N <sub>3</sub> O <sub>5</sub> S <sub>2</sub>      | [M+H] <sup>+</sup>                  | 382.0526                            | 30 | 152.0                    | 112.0                    |
| 5    | Sulfacetamide                                | 6.4         | C <sub>8</sub> H <sub>10</sub> N <sub>2</sub> O <sub>3</sub> S                    | [M+H] <sup>+</sup>                  | 215.0485                            | 25 | 108.1                    | 156.0                    |
| 6    | Amoxicillin                                  | 7.3         | C <sub>16</sub> H <sub>19</sub> N <sub>3</sub> O <sub>5</sub> S                   | [M+H] <sup>+</sup>                  | 366.1118                            | 10 | 208.0                    | 349.1                    |
| 7    | Sulfadiazine                                 | 7.3         | C <sub>10</sub> H <sub>10</sub> N <sub>4</sub> O <sub>2</sub> S                   | [M+H] <sup>+</sup>                  | 251.0597                            | 25 | 156.0                    | 108.1                    |
| 8    | Tildipirosin                                 | 7.8         | C <sub>41</sub> H <sub>71</sub> N <sub>3</sub> O <sub>8</sub>                     | [M+3H] <sup>+++</sup>               | 245.5153                            | 15 | 245.5                    | 281.2                    |
| 9    | Sulfathiazole                                | 7.9         | C <sub>9</sub> H <sub>9</sub> N <sub>3</sub> O <sub>2</sub> S <sub>2</sub>        | [M+H] <sup>+</sup>                  | 256.0209                            | 25 | 156.0                    | 108.1                    |
| 10   | Cephapirin                                   | 8.0         | C <sub>17</sub> H <sub>17</sub> N <sub>3</sub> O <sub>6</sub> S <sub>2</sub>      | [M+H] <sup>+</sup>                  | 424.0632                            | 10 | 292.1                    | 424.1                    |
| 11   | Sulfapyridine                                | 8.2         | C <sub>11</sub> H <sub>11</sub> N <sub>3</sub> O <sub>2</sub> S                   | [M+H] <sup>+</sup>                  | 250.0645                            | 25 | 156.0                    | 184.1                    |
| 12   | Cefquinome                                   | 8.5         | C <sub>23</sub> H <sub>24</sub> N <sub>6</sub> O <sub>5</sub> S <sub>2</sub>      | [M+2H] <sup>++</sup>                | 265.0698                            | 25 | 134.1                    | 199.1                    |
| 13   | Sulfamerazine                                | 8.6         | C <sub>11</sub> H <sub>12</sub> N <sub>4</sub> O <sub>2</sub> S                   | [M+H] <sup>+</sup>                  | 265.0754                            | 25 | 156.0                    | 190.0                    |
| 14   | Cefacetile                                   | 8.9         | C <sub>13</sub> H <sub>13</sub> N <sub>3</sub> O <sub>6</sub> S                   | [M+Na] <sup>+</sup>                 | 362.0417                            | 15 | 258.0                    | 178.0                    |
| 16   | Cefalonium                                   | 9.2         | C <sub>20</sub> H <sub>18</sub> N <sub>4</sub> O <sub>5</sub> S <sub>2</sub>      | [M+H] <sup>+</sup>                  | 459.0791                            | 35 | 152.0                    | 123.1                    |
| 17   | Lincomycin                                   | 9.3         | C <sub>18</sub> H <sub>34</sub> N <sub>2</sub> O <sub>6</sub> S                   | [M+H] <sup>+</sup>                  | 407.2210                            | 20 | 407.2                    | 126.1                    |
| 18   | Tulathromycin-marker                         | 9.3         | C <sub>29</sub> H <sub>56</sub> N <sub>2</sub> O <sub>9</sub>                     | [M+2H] <sup>++</sup>                | 289.2066                            | 13 | 289.2                    | 420.3                    |
| 19   | Trimethoprim                                 | 9.4         | C <sub>14</sub> H <sub>18</sub> N <sub>4</sub> O <sub>3</sub>                     | [M+H] <sup>+</sup>                  | 291.1451                            | 30 | 230.1                    | 261.1                    |
| 20   | Sulfamoxole                                  | 9.4         | C <sub>11</sub> H <sub>13</sub> N <sub>3</sub> O <sub>3</sub> S                   | [M+H] <sup>+</sup>                  | 268.0750                            | 25 | 108.1                    | 156.0                    |
| 21   | Thiamphenicol                                | 9.4         | C <sub>12</sub> H <sub>15</sub> Cl <sub>2</sub> NO <sub>5</sub> S                 | [M+NH <sub>4</sub> ] <sup>+</sup>   | 373.0386                            | 13 | 308.0                    | 338.0                    |
| 22   | 4-Epitetracycline                            | 9.4         | C <sub>22</sub> H <sub>24</sub> N <sub>2</sub> O <sub>8</sub>                     | [M+H] <sup>+</sup>                  | 445.1605                            | 33 | 201.1                    | 410.1                    |
| 23   | Marbofloxacin                                | 9.5         | C <sub>17</sub> H <sub>19</sub> FN <sub>4</sub> O <sub>4</sub>                    | [M+H] <sup>+</sup>                  | 363.1463                            | 15 | 320.1                    | 363.1                    |
| 24   | Sulfameter                                   | 9.5         | C <sub>11</sub> H <sub>12</sub> N <sub>4</sub> O <sub>3</sub> S                   | [M+H] <sup>+</sup>                  | 281.0703                            | 25 | 108.1                    | 156.0                    |
| 25   | Sulfamethizole                               | 9.7         | C <sub>9</sub> H <sub>10</sub> N <sub>4</sub> O <sub>2</sub> S <sub>2</sub>       | [M+H] <sup>+</sup>                  | 271.0318                            | 25 | 108.1                    | 156.0                    |
| IS   | Sulfamethazine- <sup>13</sup> C <sub>6</sub> | 9.8         | <sup>13</sup> C <sub>6</sub> H <sub>14</sub> N <sub>4</sub> O <sub>2</sub> S      | [M+H] <sup>+</sup>                  | 285.1112                            | -  | -                        | -                        |
| 26   | Sulfamethazine                               | 9.8         | C <sub>12</sub> H <sub>14</sub> N <sub>4</sub> O <sub>2</sub> S                   | [M+H] <sup>+</sup>                  | 279.0910                            | 25 | 124.1                    | 204.0                    |
| 27   | 4-Epioxytetracycline                         | 10.1        | C <sub>22</sub> H <sub>24</sub> N <sub>2</sub> O <sub>9</sub>                     | [M+H] <sup>+</sup>                  | 461.1555                            | 33 | 337.1                    | 426.1                    |
| 28   | Sulfamethoxypyridazine                       | 10.2        | C <sub>11</sub> H <sub>12</sub> N <sub>4</sub> O <sub>3</sub> S                   | [M+H] <sup>+</sup>                  | 281.0703                            | 25 | 156.0                    | 108.0                    |
| 29   | Tulathromycin A                              | 10.3        | C <sub>41</sub> H <sub>79</sub> N <sub>3</sub> O <sub>12</sub>                    | [M+3H] <sup>+++</sup>               | 269.5295                            | 10 | 269.5                    | 289.2                    |
| 30   | Tetracycline                                 | 10.3        | C <sub>22</sub> H <sub>24</sub> N <sub>2</sub> O <sub>8</sub>                     | [M+H] <sup>+</sup>                  | 445.1605                            | 30 | 410.1                    | 154.1                    |
| 31   | Norfloxacin                                  | 10.3        | C <sub>16</sub> H <sub>18</sub> FN <sub>3</sub> O <sub>3</sub>                    | [M+H] <sup>+</sup>                  | 320.1405                            | 13 | 320.1                    | 276.2                    |
| 32   | Cefalexin                                    | 10.5        | C <sub>16</sub> H <sub>17</sub> N <sub>3</sub> O <sub>4</sub> S                   | [M+H] <sup>+</sup>                  | 348.1012                            | 30 | 158.0                    | 174.1                    |
| IS   | Enrofloxacin-d5                              | 10.6        | C <sub>19</sub> H <sub>17</sub> D <sub>5</sub> FN <sub>3</sub> O <sub>3</sub>     | [M+H] <sup>+</sup>                  | 365.2032                            | -  | -                        | -                        |
| 33   | Enrofloxacin                                 | 10.6        | C <sub>19</sub> H <sub>22</sub> FN <sub>3</sub> O <sub>3</sub>                    | [M+H] <sup>+</sup>                  | 360.1718                            | 40 | 203.1                    | 245.1                    |
| 34   | Ciprofloxacin                                | 10.6        | C <sub>17</sub> H <sub>18</sub> FN <sub>3</sub> O <sub>3</sub>                    | [M+H] <sup>+</sup>                  | 332.1405                            | 35 | 332.1                    | 245.1                    |
| 35   | Oxytetracycline                              | 10.6        | C <sub>22</sub> H <sub>24</sub> N <sub>2</sub> O <sub>9</sub>                     | [M+H] <sup>+</sup>                  | 461.1555                            | 30 | 337.1                    | 426.1                    |
| 36   | Danofloxacin                                 | 10.7        | C <sub>19</sub> H <sub>20</sub> FN <sub>3</sub> O <sub>3</sub>                    | [M+H] <sup>+</sup>                  | 358.1561                            | 40 | 358.2                    | 255.1                    |
| 37   | Cefazolin                                    | 10.8        | C <sub>14</sub> H <sub>14</sub> N <sub>8</sub> O <sub>4</sub> S <sub>3</sub>      | [M+H] <sup>+</sup>                  | 455.0373                            | 35 | 156.0                    | 133.0                    |
| 38   | Sulfachloropyridazine                        | 10.8        | C <sub>10</sub> H <sub>9</sub> ClN <sub>4</sub> O <sub>2</sub> S                  | [M+H] <sup>+</sup>                  | 285.0208                            | 25 | 156.0                    | 108.0                    |
| 39   | Sulfamethoxazole                             | 10.9        | C <sub>10</sub> H <sub>11</sub> N <sub>3</sub> O <sub>3</sub> S                   | [M+H] <sup>+</sup>                  | 254.0594                            | 25 | 156.0                    | 254.0                    |
| 40   | Difloxacin                                   | 11.0        | C <sub>21</sub> H <sub>19</sub> F <sub>2</sub> N <sub>3</sub> O <sub>3</sub>      | [M+H] <sup>+</sup>                  | 400.1467                            | 27 | 299.1                    | 279.1                    |
| 41   | Ampicillin                                   | 11.1        | C <sub>16</sub> H <sub>19</sub> N <sub>3</sub> O <sub>4</sub> S                   | [M+H] <sup>+</sup>                  | 350.1169                            | 15 | 106.1                    | 192.1                    |
| 42   | Sulfamonomethoxine                           | 11.2        | C <sub>11</sub> H <sub>12</sub> N <sub>4</sub> O <sub>3</sub> S                   | [M+H] <sup>+</sup>                  | 281.0703                            | 25 | 156.0                    | 108.1                    |
| IS   | Florfenicol-d3                               | 11.2        | C <sub>12</sub> H <sub>11</sub> D <sub>3</sub> Cl <sub>2</sub> FNO <sub>4</sub> S | [M+H] <sup>+</sup>                  | 361.0266                            | -  | -                        | -                        |
| 43   | Florfenicol                                  | 11.2        | C <sub>12</sub> H <sub>14</sub> Cl <sub>2</sub> FNO <sub>4</sub> S                | [M+H] <sup>+</sup>                  | 358.0077                            | 10 | 340.0                    | 241.0                    |
| 44   | Cefoperazone                                 | 11.3        | C <sub>25</sub> H <sub>27</sub> N <sub>9</sub> O <sub>8</sub> S <sub>2</sub>      | [M+H] <sup>+</sup>                  | 646.1497                            | 23 | 143.1                    | 290.1                    |
| 45   | Sulfadoxin                                   | 11.3        | C <sub>12</sub> H <sub>14</sub> N <sub>4</sub> O <sub>4</sub> S                   | [M+H] <sup>+</sup>                  | 311.0809                            | 25 | 156.0                    | 108.1                    |

|    |                        |      |                                                                                             |                                                                     |          |    |       |       |
|----|------------------------|------|---------------------------------------------------------------------------------------------|---------------------------------------------------------------------|----------|----|-------|-------|
| 46 | Sarafloxacin           | 11.3 | C <sub>20</sub> H <sub>17</sub> F <sub>2</sub> N <sub>3</sub> O <sub>3</sub>                | [M+H] <sup>+</sup>                                                  | 386.1311 | 45 | 299.1 | 386.1 |
| 47 | Sulfisoxazole          | 11.4 | C <sub>11</sub> H <sub>13</sub> N <sub>3</sub> O <sub>3</sub> S                             | [M+H] <sup>+</sup>                                                  | 268.0750 | 25 | 108.1 | 156.0 |
| 48 | 4-Epichlortetracycline | 11.7 | C <sub>22</sub> H <sub>23</sub> ClN <sub>2</sub> O <sub>8</sub>                             | [M+H] <sup>+</sup>                                                  | 479.1216 | 30 | 444.1 | 154.1 |
| 49 | Neospiramycin          | 11.9 | C <sub>36</sub> H <sub>62</sub> N <sub>2</sub> O <sub>11</sub>                              | [M+2H] <sup>++</sup>                                                | 350.2250 | 15 | 174.1 | 160.1 |
| IS | Spiramycin-I-d3        | 12.6 | C <sub>43</sub> H <sub>71</sub> D <sub>3</sub> N <sub>2</sub> O <sub>14</sub>               | [M+2H] <sup>++</sup>                                                | 423.7737 | -  | -     | -     |
| 50 | Spiramycin             | 12.6 | C <sub>43</sub> H <sub>74</sub> N <sub>2</sub> O <sub>14</sub>                              | [M+2H] <sup>++</sup>                                                | 422.2643 | 13 | 422.3 | 540.3 |
| 51 | Chlortetracycline      | 12.7 | C <sub>22</sub> H <sub>23</sub> ClN <sub>2</sub> O <sub>8</sub>                             | [M+H] <sup>+</sup>                                                  | 479.1216 | 25 | 154.1 | 444.1 |
| IS | Sulfadimethoxine       | 13.2 | C <sub>12</sub> H <sub>14</sub> N <sub>4</sub> O <sub>4</sub> S                             | [M+H] <sup>+</sup>                                                  | 311.0809 | 25 | 156.0 | 108.1 |
| 52 | Sulfaquinoxaline       | 13.6 | C <sub>14</sub> H <sub>12</sub> N <sub>4</sub> O <sub>2</sub> S                             | [M+H] <sup>+</sup>                                                  | 301.0754 | 25 | 156.0 | 108.1 |
| IS | Methacycline           | 13.8 | C <sub>22</sub> H <sub>22</sub> N <sub>2</sub> O <sub>8</sub>                               | [M+H] <sup>+</sup>                                                  | 443.1449 | -  | -     | -     |
| 53 | Oxolinic Acid          | 13.8 | C <sub>13</sub> H <sub>11</sub> NO <sub>5</sub>                                             | [M+H] <sup>+</sup>                                                  | 262.0710 | 40 | 160.0 | 234.1 |
| IS | Ceftiofur-d3           | 13.8 | C <sub>19</sub> H <sub>14</sub> D <sub>3</sub> N <sub>5</sub> O <sub>7</sub> S <sub>3</sub> | [M+H] <sup>+</sup>                                                  | 527.0598 | -  | -     | -     |
| 54 | Ceftiofur              | 13.8 | C <sub>19</sub> H <sub>17</sub> N <sub>5</sub> O <sub>7</sub> S <sub>3</sub>                | [M+H] <sup>+</sup>                                                  | 524.0363 | 27 | 126.0 | 197.0 |
| 55 | Gamithromycin          | 13.9 | C <sub>40</sub> H <sub>76</sub> N <sub>2</sub> O <sub>12</sub>                              | [M+H] <sup>++</sup>                                                 | 389.2772 | 10 | 389.3 | 619.5 |
| 56 | Tilmicosin             | 14.0 | C <sub>46</sub> H <sub>80</sub> N <sub>2</sub> O <sub>13</sub>                              | [M+2H] <sup>++</sup>                                                | 435.2903 | 20 | 695.5 | 435.3 |
| 57 | Pirlimycin             | 14.4 | C <sub>17</sub> H <sub>31</sub> ClN <sub>2</sub> O <sub>5</sub> S                           | [M+H] <sup>+</sup>                                                  | 411.1715 | 20 | 363.2 | 112.1 |
| 58 | Doxycycline            | 14.4 | C <sub>22</sub> H <sub>24</sub> N <sub>2</sub> O <sub>8</sub>                               | [M+H] <sup>+</sup>                                                  | 445.1605 | 30 | 321.1 | 428.1 |
| 59 | Nalidixic acid         | 15.5 | C <sub>12</sub> H <sub>12</sub> N <sub>2</sub> O <sub>3</sub>                               | [M+H] <sup>+</sup>                                                  | 233.0921 | 30 | 233.1 | 205.1 |
| IS | Penicillin G-d7        | 15.9 | C <sub>16</sub> H <sub>11</sub> D <sub>7</sub> N <sub>2</sub> O <sub>4</sub> S              | [M+Na] <sup>+</sup>                                                 | 364.1319 | -  | -     | -     |
| 60 | Penicillin G           | 15.9 | C <sub>16</sub> H <sub>18</sub> N <sub>2</sub> O <sub>4</sub> S                             | [M+Na] <sup>+</sup>                                                 | 357.0880 | 20 | 198.1 | 182.0 |
| 61 | Tiamulin               | 15.9 | C <sub>28</sub> H <sub>47</sub> NO <sub>4</sub> S                                           | [M+H] <sup>+</sup>                                                  | 494.3299 | 13 | 192.0 | 494.3 |
| 62 | Flumequine             | 16.0 | C <sub>14</sub> H <sub>12</sub> FNO <sub>3</sub>                                            | [M+H] <sup>+</sup>                                                  | 262.0874 | 35 | 238.1 | 262.1 |
| 63 | Tylosin A              | 16.1 | C <sub>46</sub> H <sub>77</sub> NO <sub>17</sub>                                            | [M-C <sub>8</sub> H <sub>15</sub> O <sub>5</sub> +3H] <sup>++</sup> | 363.7248 | 22 | 174.1 | 363.2 |
| 64 | Erythromycin A         | 16.4 | C <sub>37</sub> H <sub>67</sub> NO <sub>13</sub>                                            | [M+H] <sup>+</sup>                                                  | 734.4685 | 15 | 576.4 | 734.5 |
| 65 | Tylosin-3-acetate      | 16.5 | C <sub>48</sub> H <sub>79</sub> NO <sub>18</sub>                                            | [M-C <sub>8</sub> H <sub>15</sub> O <sub>5</sub> +3H] <sup>++</sup> | 384.7301 | 17 | 109.1 | 174.1 |
| 66 | Oxacillin              | 17.0 | C <sub>19</sub> H <sub>19</sub> N <sub>3</sub> O <sub>5</sub> S                             | [M+Na] <sup>+</sup>                                                 | 424.0938 | 10 | 265.1 | 424.1 |
| 67 | Penicillin V           | 17.0 | C <sub>16</sub> H <sub>18</sub> N <sub>2</sub> O <sub>5</sub> S                             | [M+Na] <sup>+</sup>                                                 | 373.0829 | 12 | 373.1 | 214.0 |
| 68 | Cloxacillin            | 17.3 | C <sub>19</sub> H <sub>18</sub> ClN <sub>3</sub> O <sub>5</sub> S                           | [M+Na] <sup>+</sup>                                                 | 458.0548 | 10 | 299.0 | 458.1 |
| 69 | Valnemulin             | 17.9 | C <sub>31</sub> H <sub>52</sub> N <sub>2</sub> O <sub>5</sub> S                             | [M+H] <sup>+</sup>                                                  | 565.3670 | 11 | 263.1 | 565.4 |
| 70 | Dicloxacillin          | 17.9 | C <sub>19</sub> H <sub>17</sub> Cl <sub>2</sub> N <sub>3</sub> O <sub>5</sub> S             | [M+Na] <sup>+</sup>                                                 | 492.0158 | 13 | 492.0 | 333.0 |
| 71 | Nafcillin              | 18.0 | C <sub>21</sub> H <sub>22</sub> N <sub>2</sub> O <sub>5</sub> S                             | [M+H] <sup>+</sup>                                                  | 415.1322 | 12 | 199.1 | 256.1 |
| 72 | Tylvalosin             | 18.2 | C <sub>53</sub> H <sub>87</sub> NO <sub>19</sub>                                            | [M+CH <sub>3</sub> OH+Na] <sup>++</sup>                             | 548.8050 | 17 | 109.1 | 174.1 |
| 73 | Rifaximin              | 19.3 | C <sub>43</sub> H <sub>51</sub> N <sub>3</sub> O <sub>11</sub>                              | [M+H] <sup>+</sup>                                                  | 786.3596 | 20 | 754.4 | 786.4 |

<sup>1</sup> Ions used only for qualitative purposes (ion ratio calculated in Product Ion scan spectrum).

## References

- Desmarchelier, A.; Feuerrigel, P.; Ahmed, H.F.; Moulin, J.; Beck, A.; Mujahid, C.; Bessaire, T.; Savoy, M.-C.; Mottier, P. Stability study of veterinary drugs in standard solutions for LC-MS/MS screening in food. *Food Addit. Contam. Part A* **2018**, *35*, 696–706, doi:10.1080/19440049.2018.1433333.
- Jang, J.-W.; Lee, K.-S.; Kwon, K.; Bae, S.-C.; Kim, H.S. Simultaneous determination of thirteen quinolones in livestock and fishery products using ultra performance LC with electrospray ionization tandem mass spectrometry. *Food Sci. Biotechnol.* **2013**, *22*, 1–9, doi:10.1007/s10068-013-0201-y.
